# Supplementary material for: Chromatin dynamics during DNA replication
Source: HighWire-hosted journal article supplement (doi:10.1101/gr.201244.115), 2016-05-25
Supplement: Supplemental_Fig_S2.docx [file Supplemental_Fig_S2.docx]

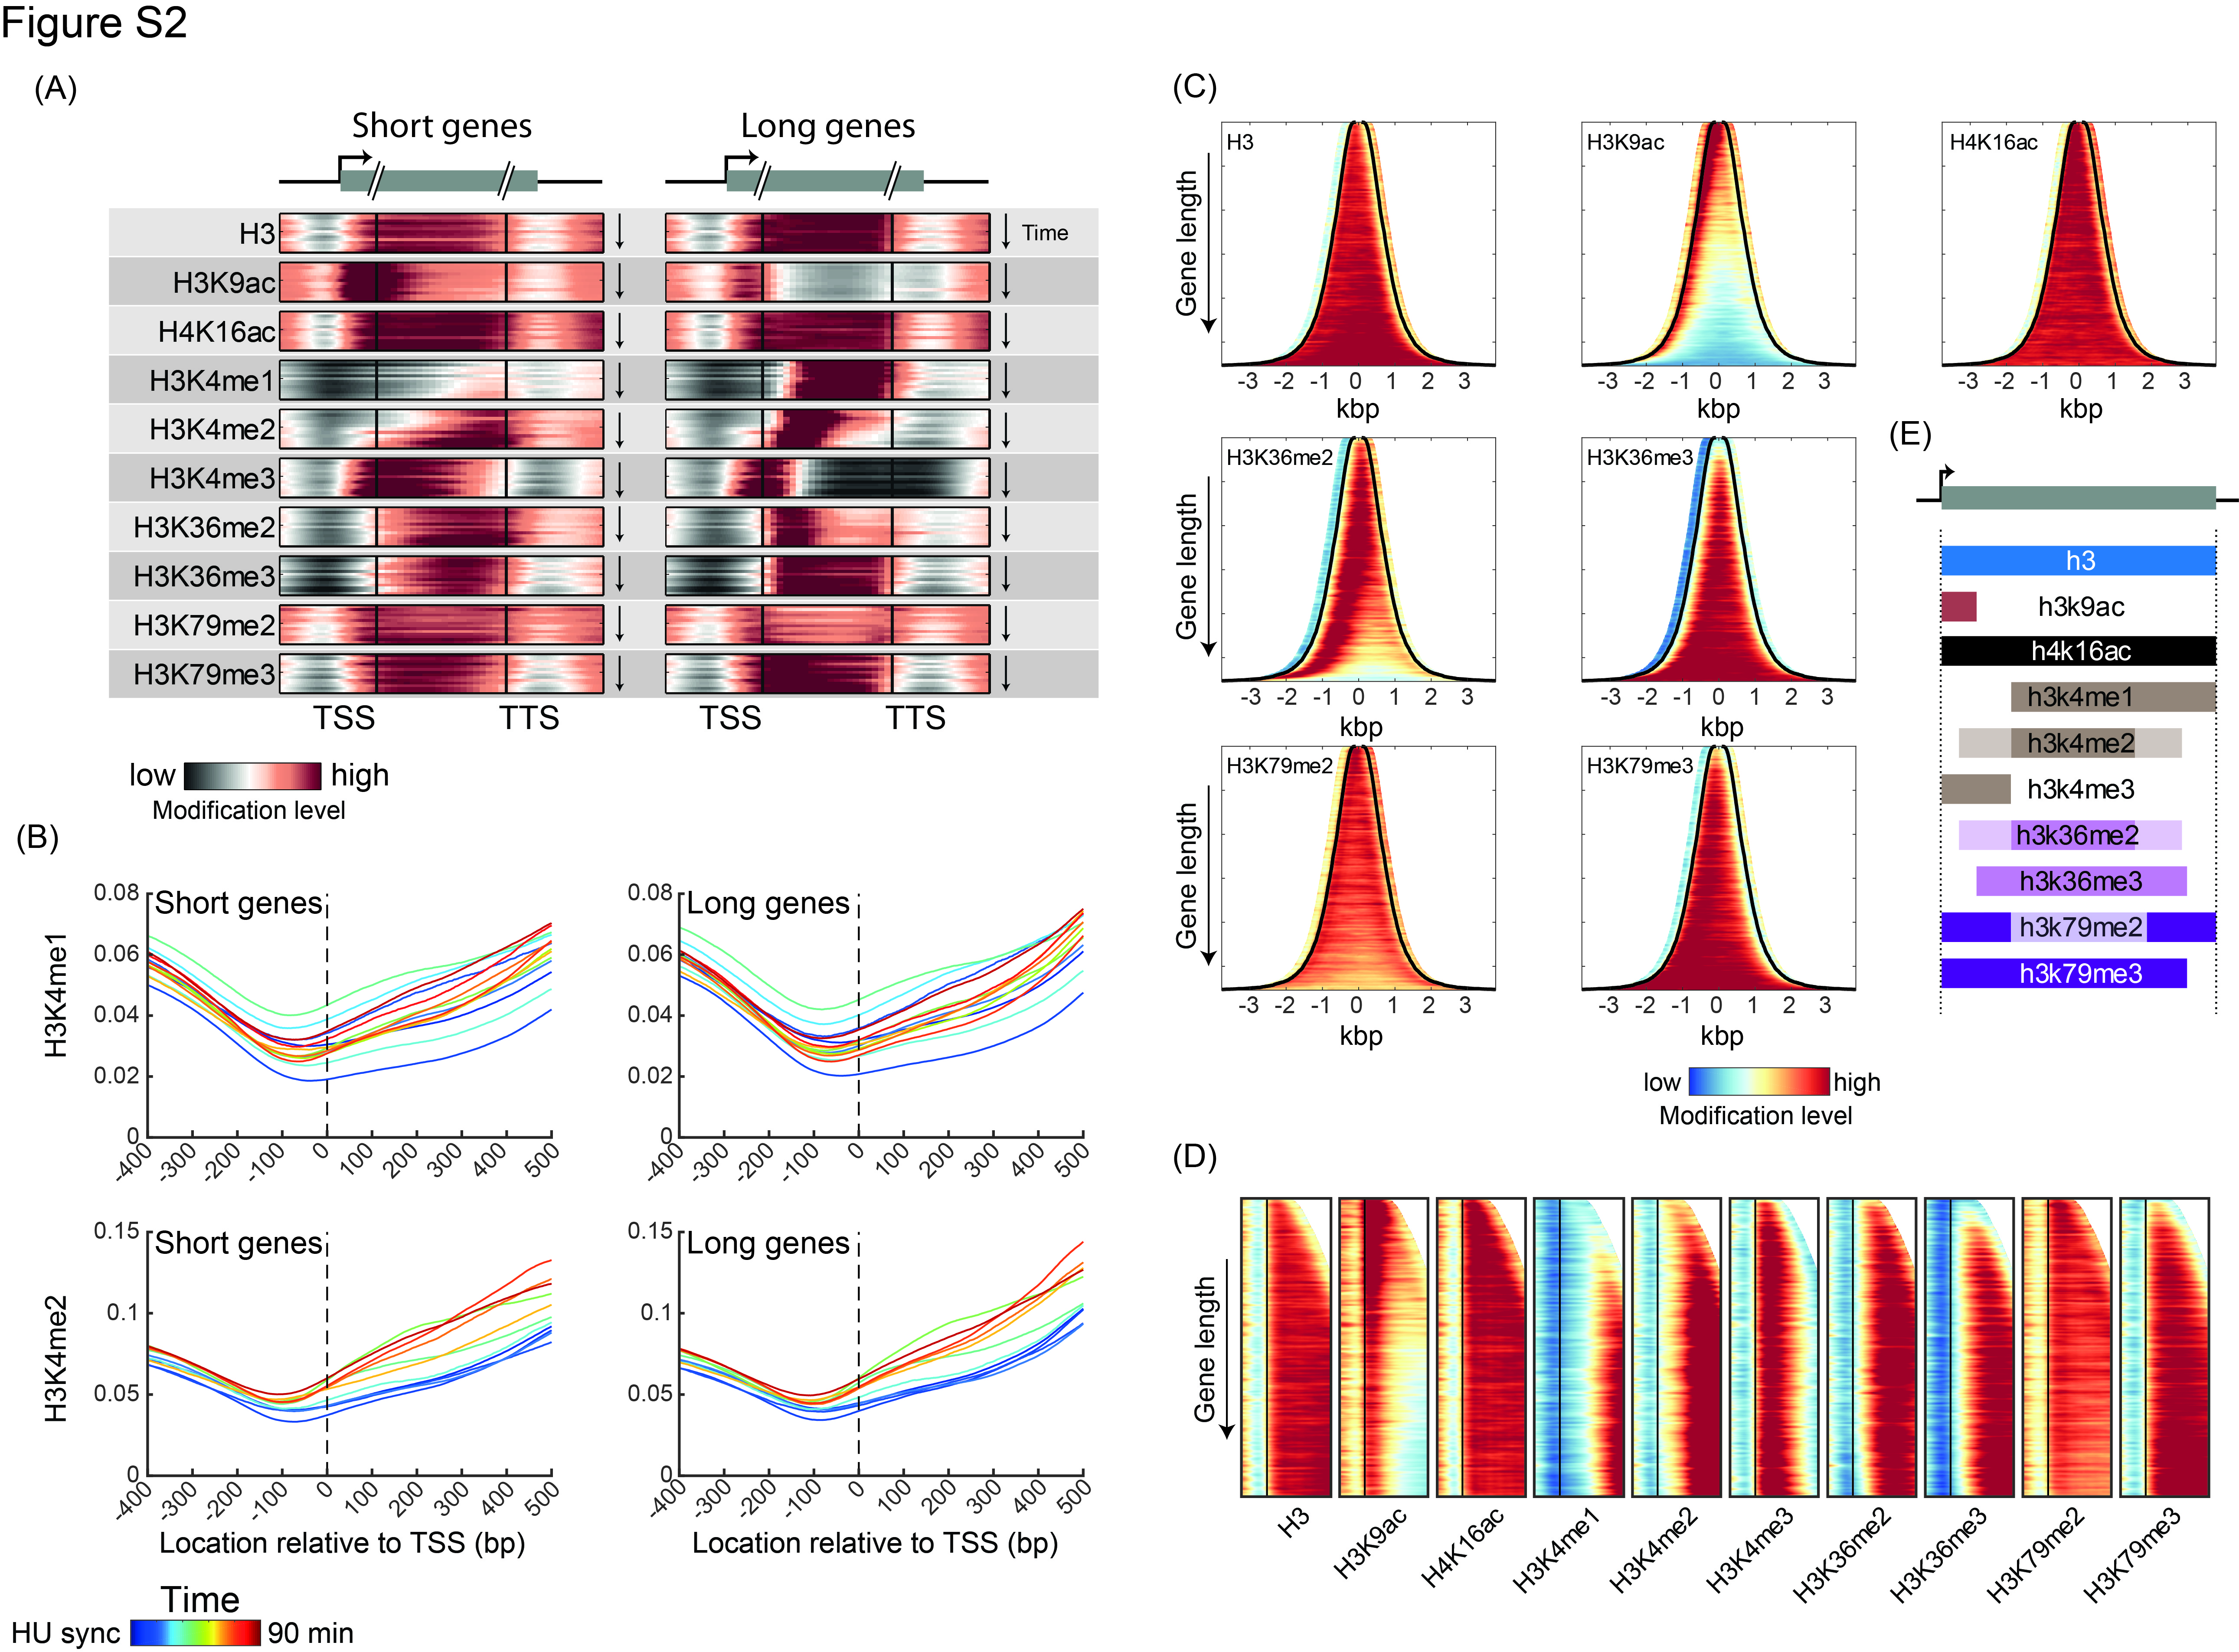


***Figure S2: Gene length effect on patterns of histone modifications:***

1. *Metagene analysis for short and long genes:* As in Figure 1C, separated for 1000 shortest and 1000 longest genes, omitting from analysis genes <500bp or >3000bp.
2. *Changes in H3K4 methylation:* Average signal of H3K4me1 or H3K4me2 on short (left) or long (right) genes, defined as in (A). Genes were aligned to the TSS and plotted for all time-points.
3. *Gene length-dependent effects on modification patterns:* as in Figure 1D, for all other modifications, aligned by the center of the gene (set to 0) and averaged over all time-points in the time-course. Black left line represents TSS, black right line represents TTS.
4. Same as in (C), aligning all genes to the 5’ end, according to the TSS, plotting data from TSS-400bp to TSS+1kb.
5. *Scheme of histone modifications patterns:* Cartoon summarizing the general patterns of the tested histone modifications along genes, according to Figure 1D&S2C. For example, H3K9ac is found up to ~250bp after TSS of genes, while H3K4me1 is found from ~TSS+500bp to gene’s 3’.
