# Supplementary material for: Chromatin dynamics during DNA replication
Source: HighWire-hosted journal article supplement (doi:10.1101/gr.201244.115), 2016-05-25
Supplement: Supplemental_Fig_S8.docx [file Supplemental_Fig_S8.docx]

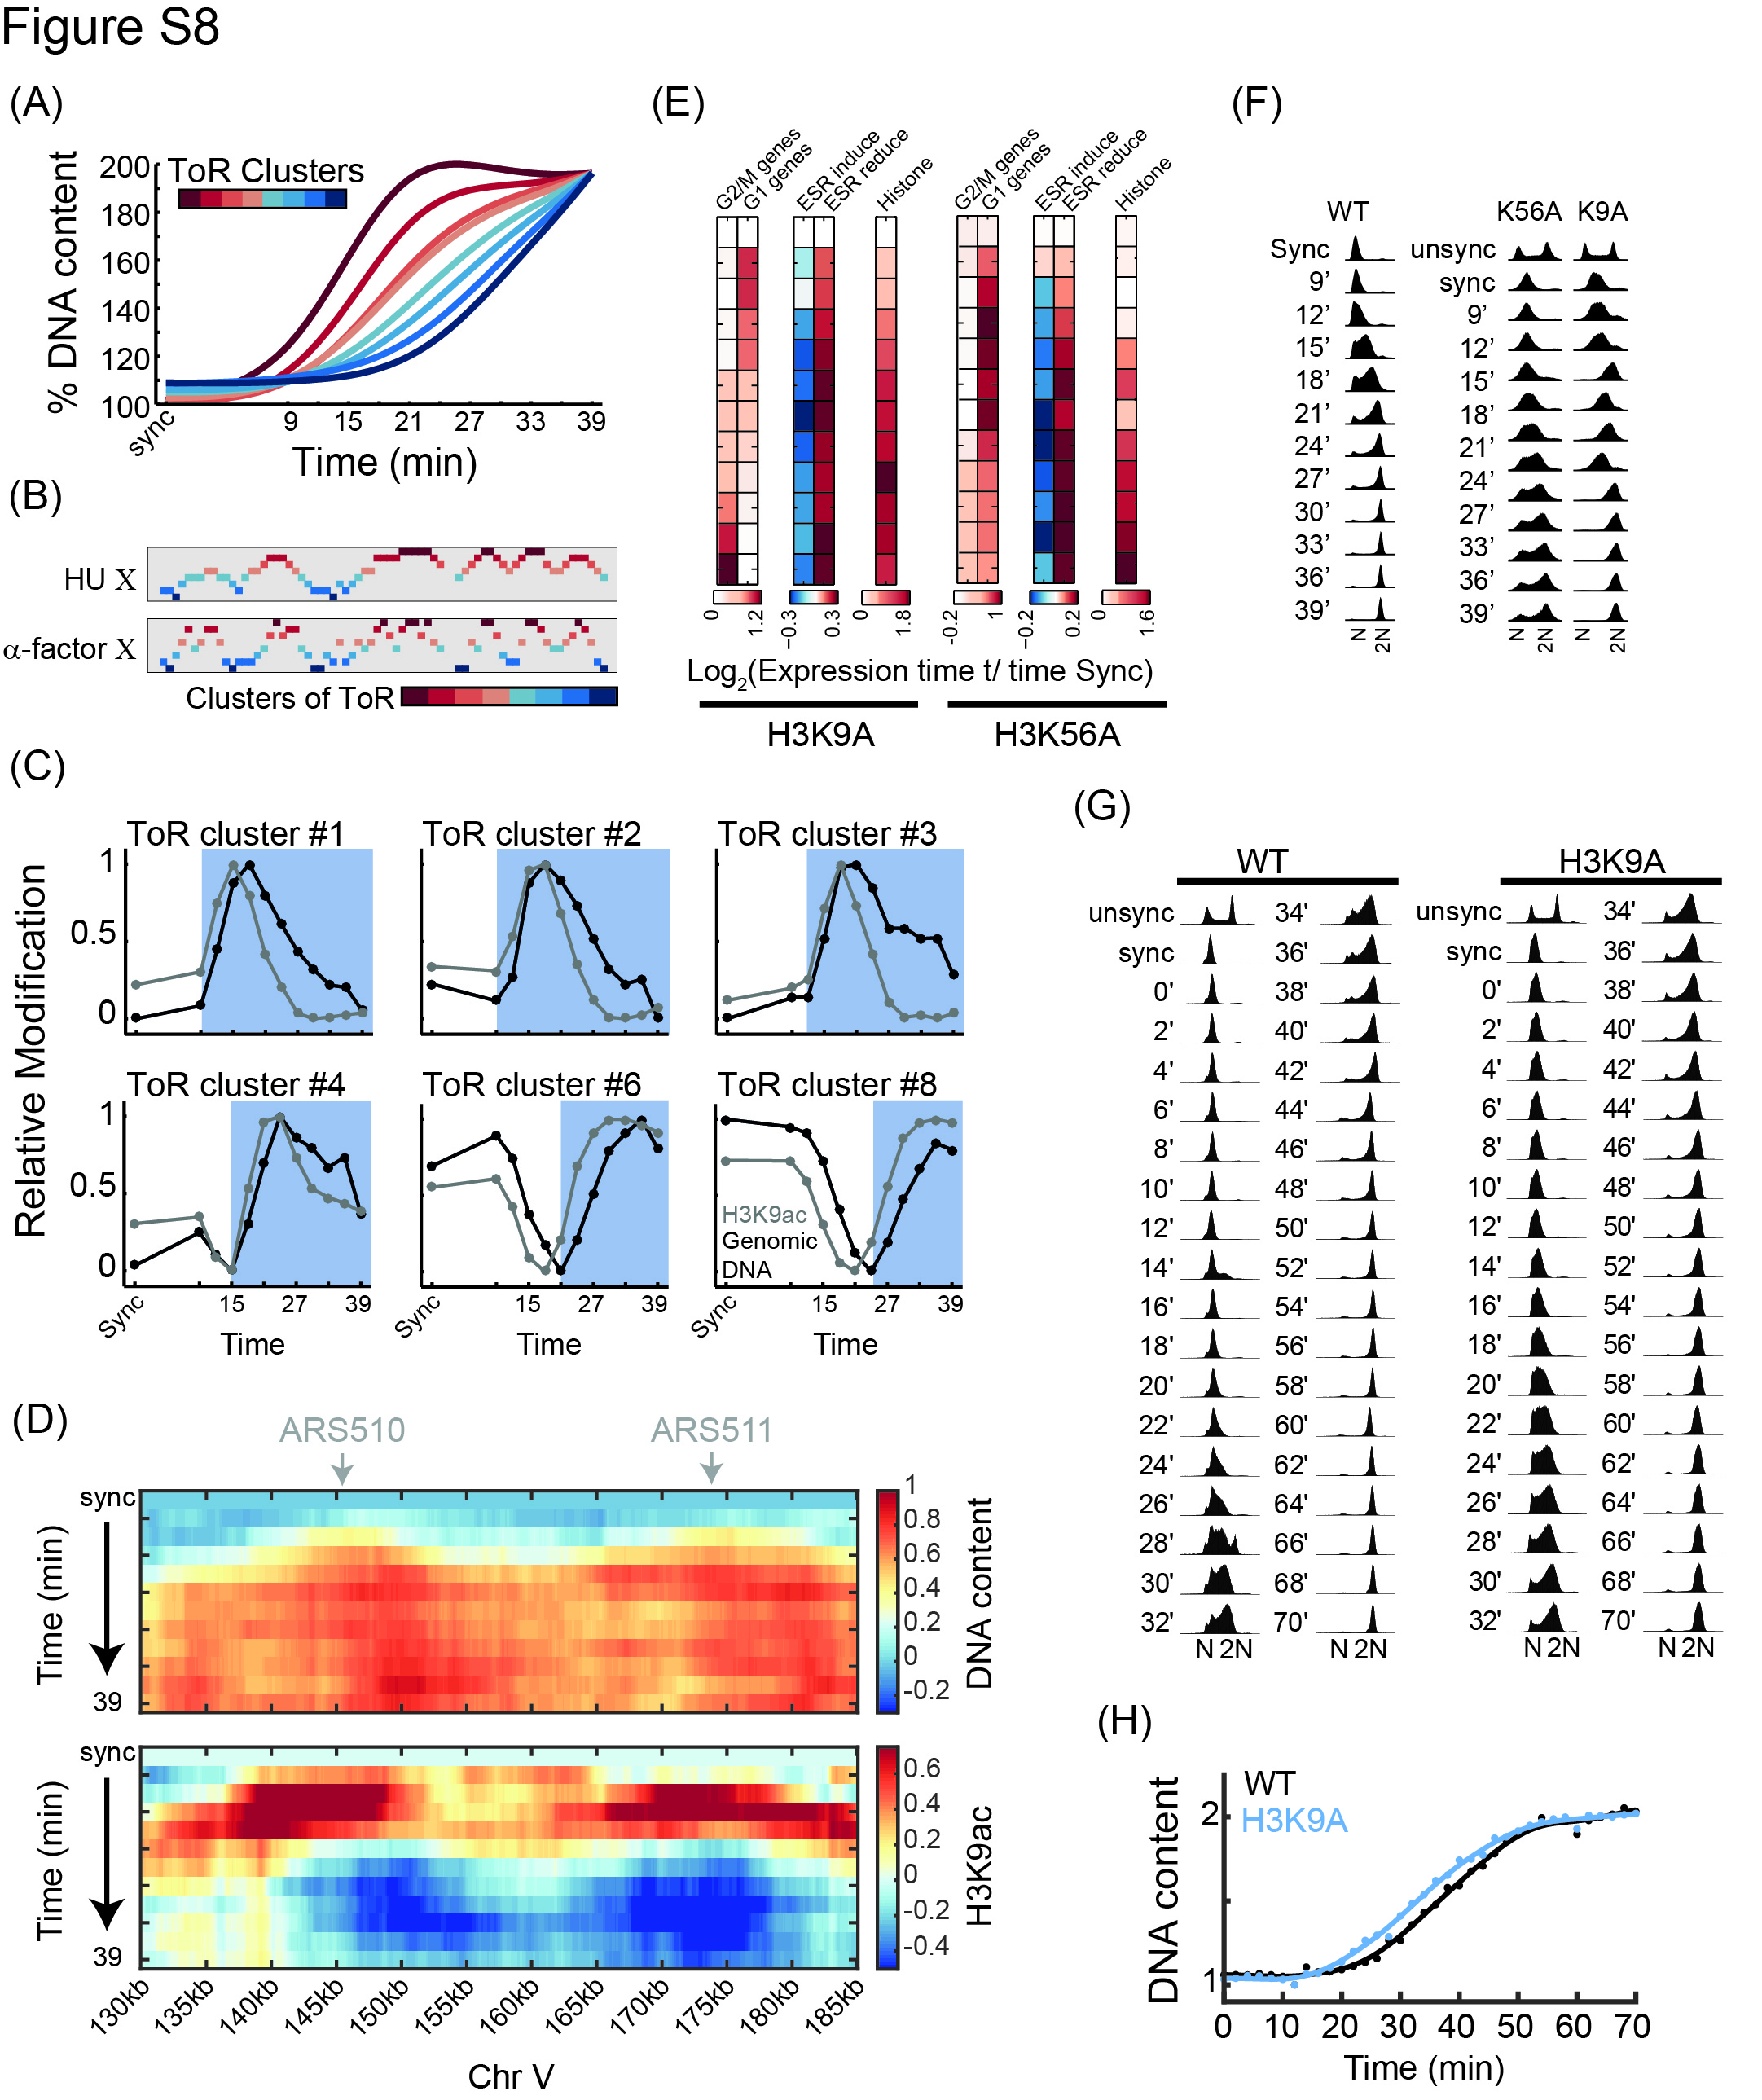


***Figure S8: Acetylation of H3K9 precedes replication:***

1. *Replication dynamics in cells released from α-factor synchronization:* Time of replication clusters were generated for α-factor experiments (independent of assignment in HU experiments) and increase in DNA content is plotted as in Figure S5A.
2. *Replication programs deduced from DNA abundance:* As in Figure 1F, for replication clusters on chromosome X, comparing the two differentially synchronized experiments. See Figure S9C for all other chromosomes.
3. *H3K9ac dynamics with respect to replication:* As in Figure 4B, the average signals for genomic DNA (black) and H3K9ac (grey), for different replication clusters (ToR cluster 1-8, from early replicating to late replicating).
4. As in Figure 4E, for the complete time course.
5. *Gene expression changes along the time course for H3 point mutations:* Plotted as in Figure 1B for H3K9A and H3K56A mutants.
6. *DNA content along the synchronized cell cycle progression of WT, H3K9A, and H3K56A:* DNA content measured by flow cytometry*,* as in Figure S1B.
7. –(H) *Replication progression in H3K9A mutant:* Replication progression was measured using flow cytometry in H3K9A and its corresponding wild type in a 2-minute time resolution following -factor synchronization (G) and the accumulating signal was quantified along time (H).
