# Supplementary material for: Chromatin dynamics during DNA replication
Source: HighWire-hosted journal article supplement (doi:10.1101/gr.201244.115), 2016-05-25
Supplement: Supplemental_Fig_S9.docx [file Supplemental_Fig_S9.docx]

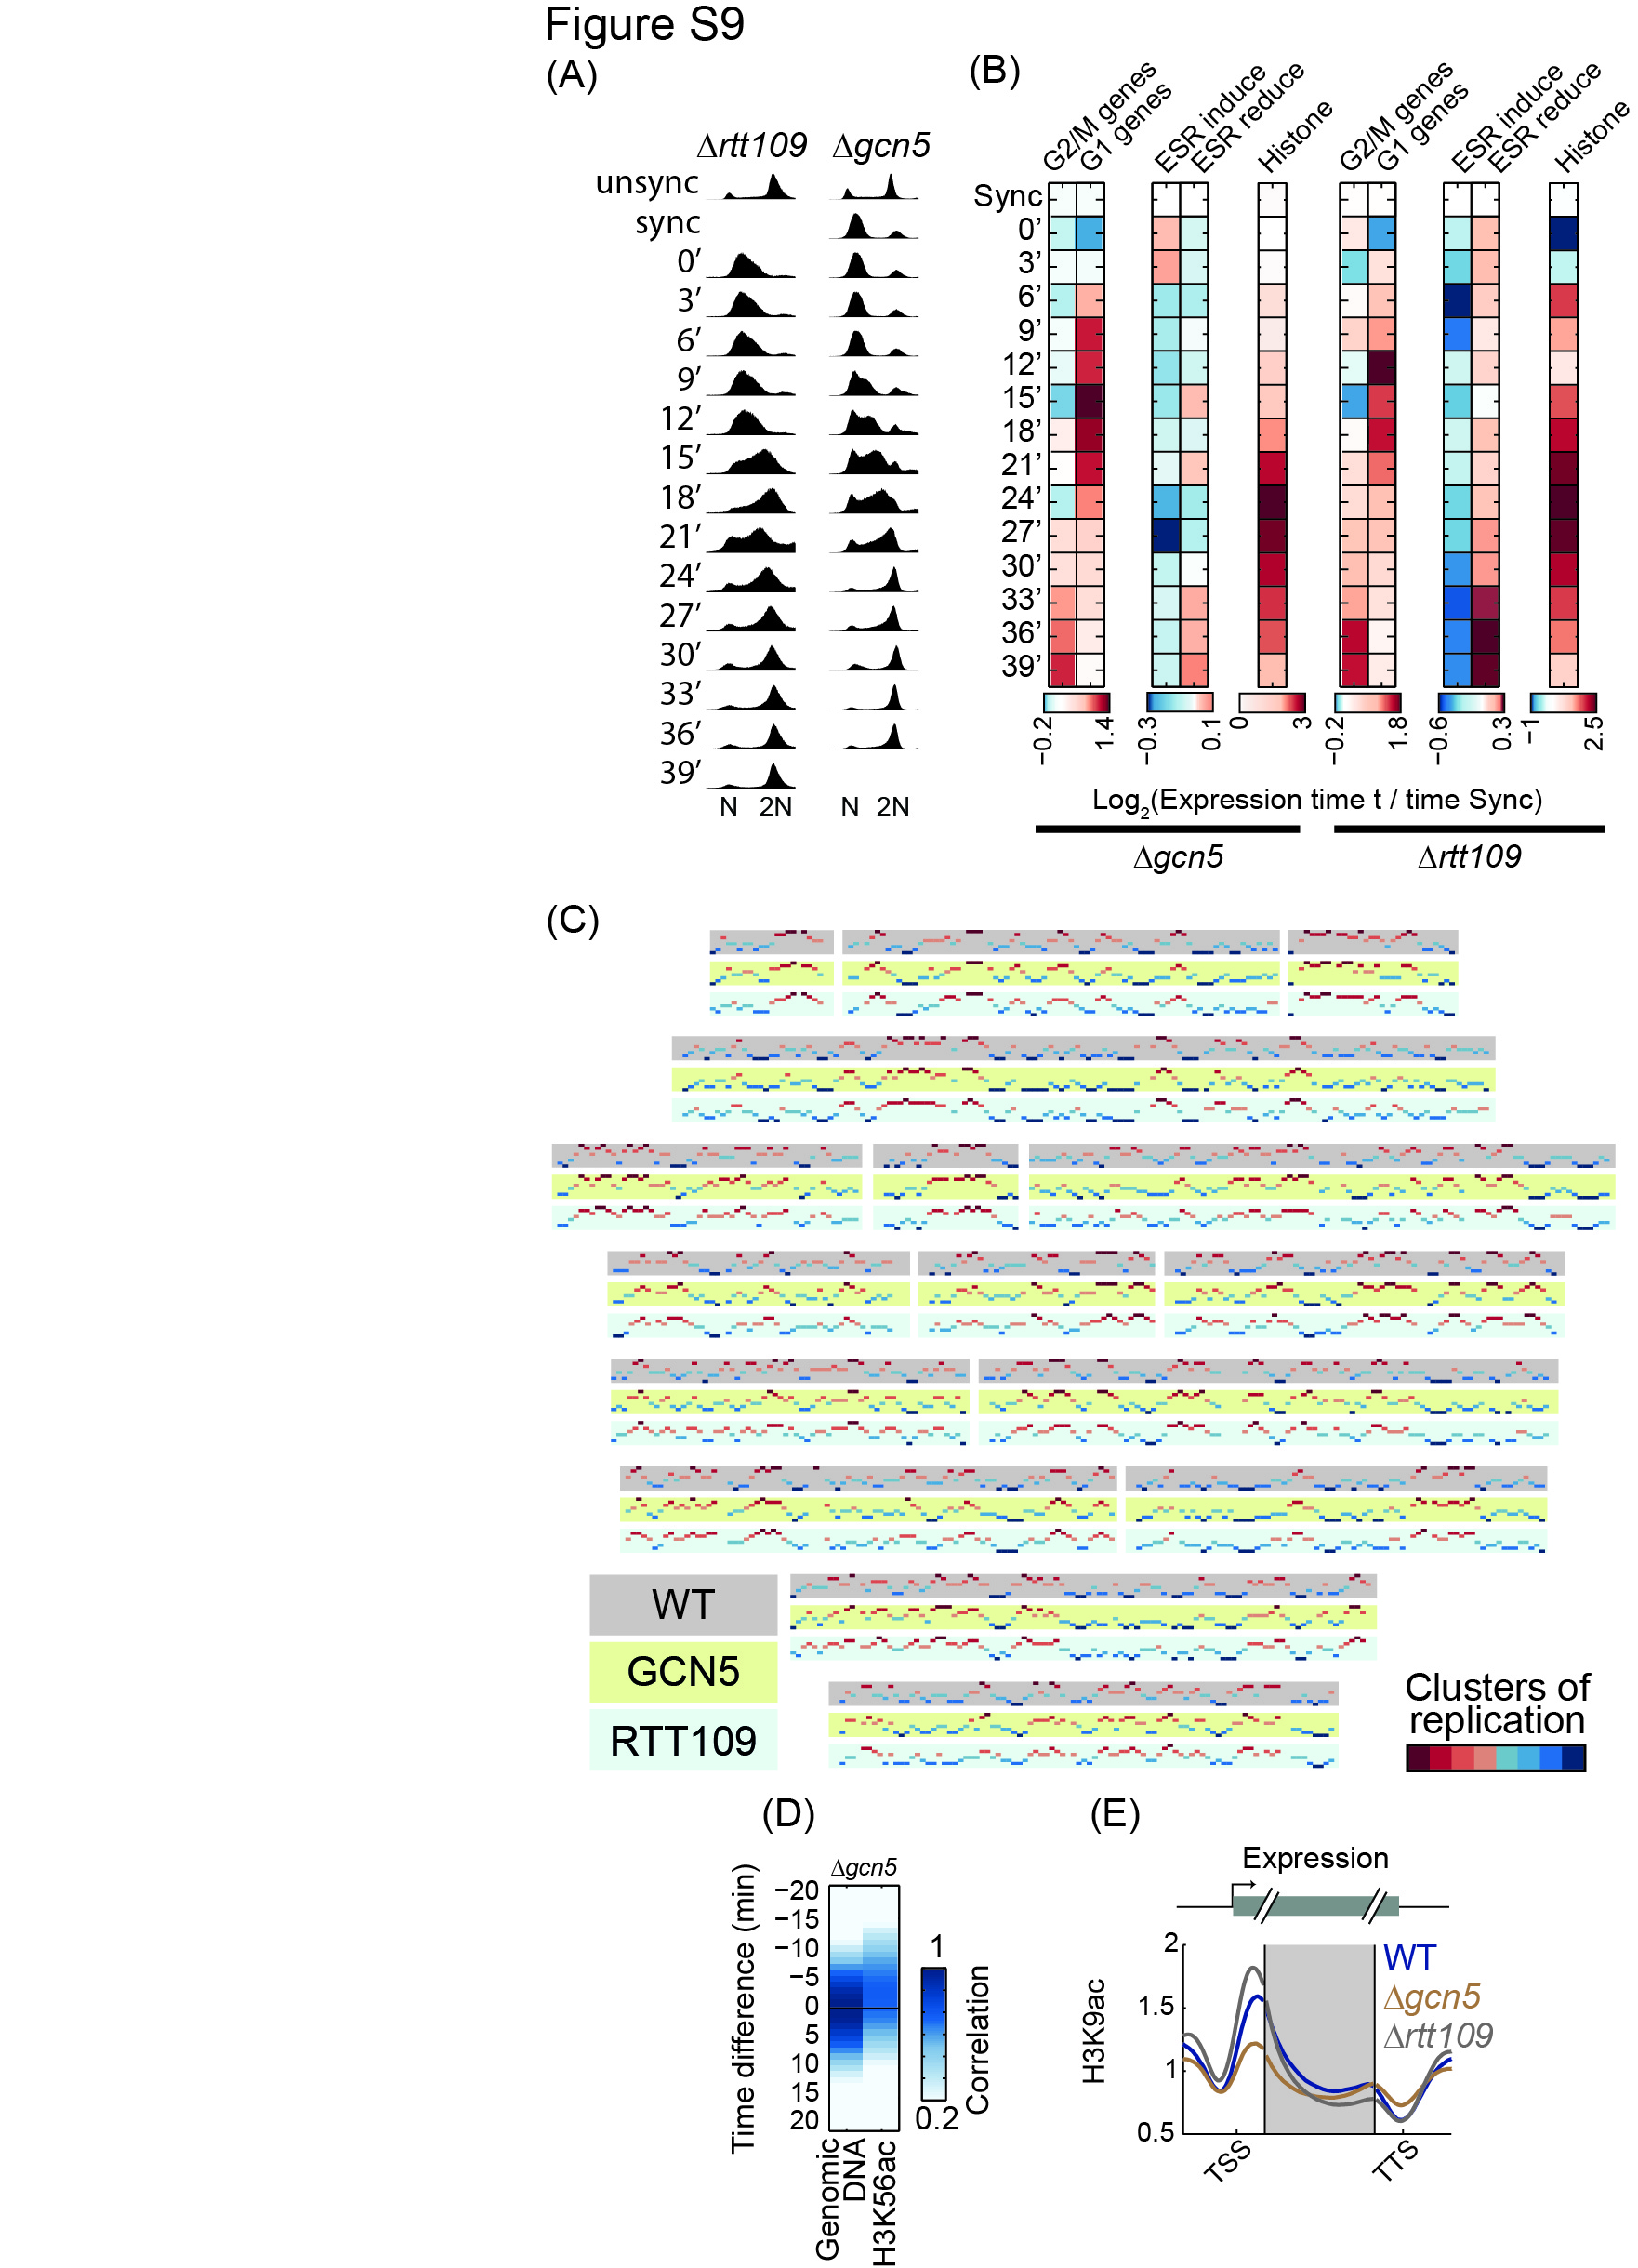


***Figure S9: Cell-cycle and replication progression in strains deleted of acetyltransferases responsible of H3K9ac***

1. *Synchronization in H3K9ac acetyltransferases deletions:* DNA content along the synchronized cell cycle progression of *gcn5* & *rtt109* as measured by flow cytometry*.* Plotted as in Figure S1B, the synchronized time-point in *rtt109* and 39 min in*gcn5* are missing.
2. *Gene expression changes in H3K9ac acetyltransferases deletions:* Expression changes in *gcn5* and *rtt109*. Plotted as in Figure 1B.
3. *Whole genome replication profiles for gcn5 and rtt109 relative to WT:* Genomic replication profiles, as in Figure S5C, are shown for the 3 strains (shaded boxes, WT - grey, *gcn5* – yellow, *rtt109* - blue) when synchronized using α-factor. Replication clusters were calculated independently for each strain.
4. *H3K56ac deposition in cells deleted of Gcn5:* Same as Figure 5A for H3K56ac in *gcn5*. Short delay in H3K56ac is attributed to cross-reactivity with H3K9ac (Drogaris et al. 2012), addressed in Figure 4 and the main text.
5. *Metagene analysis of H3K9ac average pattern:* Metagene analysis for *gcn5* & *rtt109* relative to WT in synchronized cells. Plotted as in Figure 5B for all genes.
