# Supplementary material for: Chromatin dynamics during DNA replication
Source: HighWire-hosted journal article supplement (doi:10.1101/gr.201244.115), 2016-05-25
Supplement: Supplemental_Fig_S10.docx [file Supplemental_Fig_S10.docx]

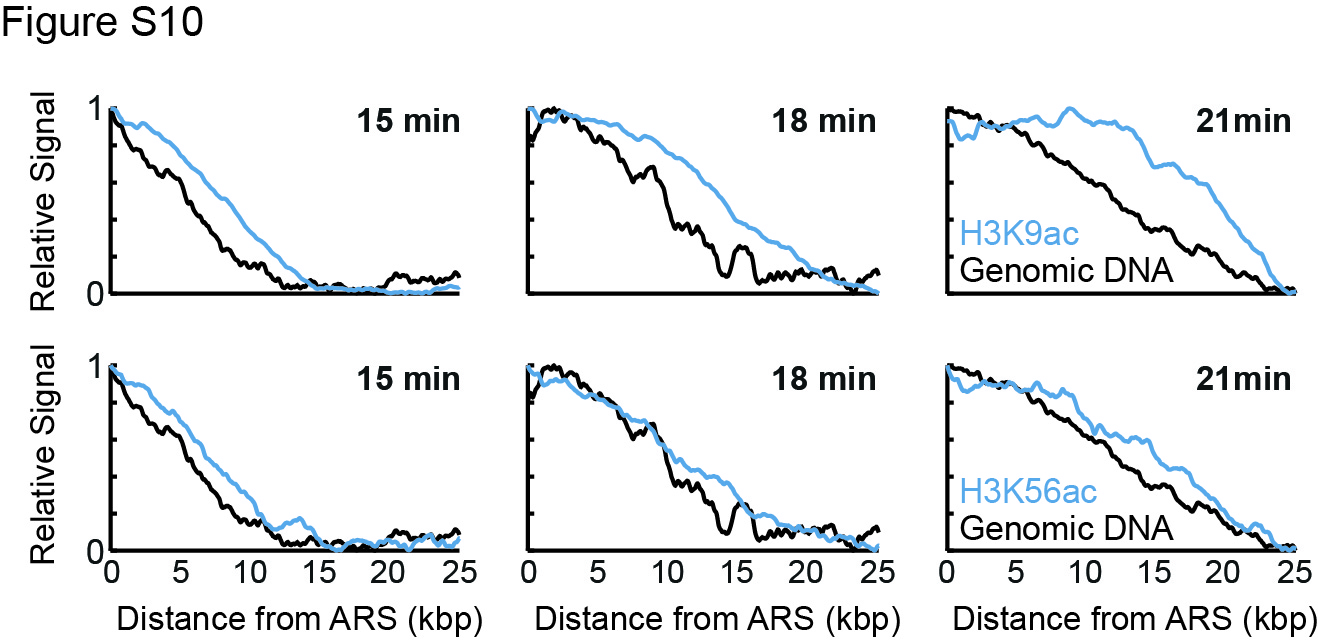


***Figure S10: Spatial spreading of H3K56ac compared to replication in gcn5***

Spatial progression of H3K9ac (top) or H3K56ac (bottom) relative to DNA is shown for *gcn5*, around early replicated origins, as in Figure 5E. Data for H3K9ac as in Figure 5E and shown here for comparison.
