# Supplementary material for: Chromatin dynamics during DNA replication
Source: HighWire-hosted journal article supplement (doi:10.1101/gr.201244.115), 2016-05-25
Supplement: Supplemental_Fig_S11.docx [file Supplemental_Fig_S11.docx]

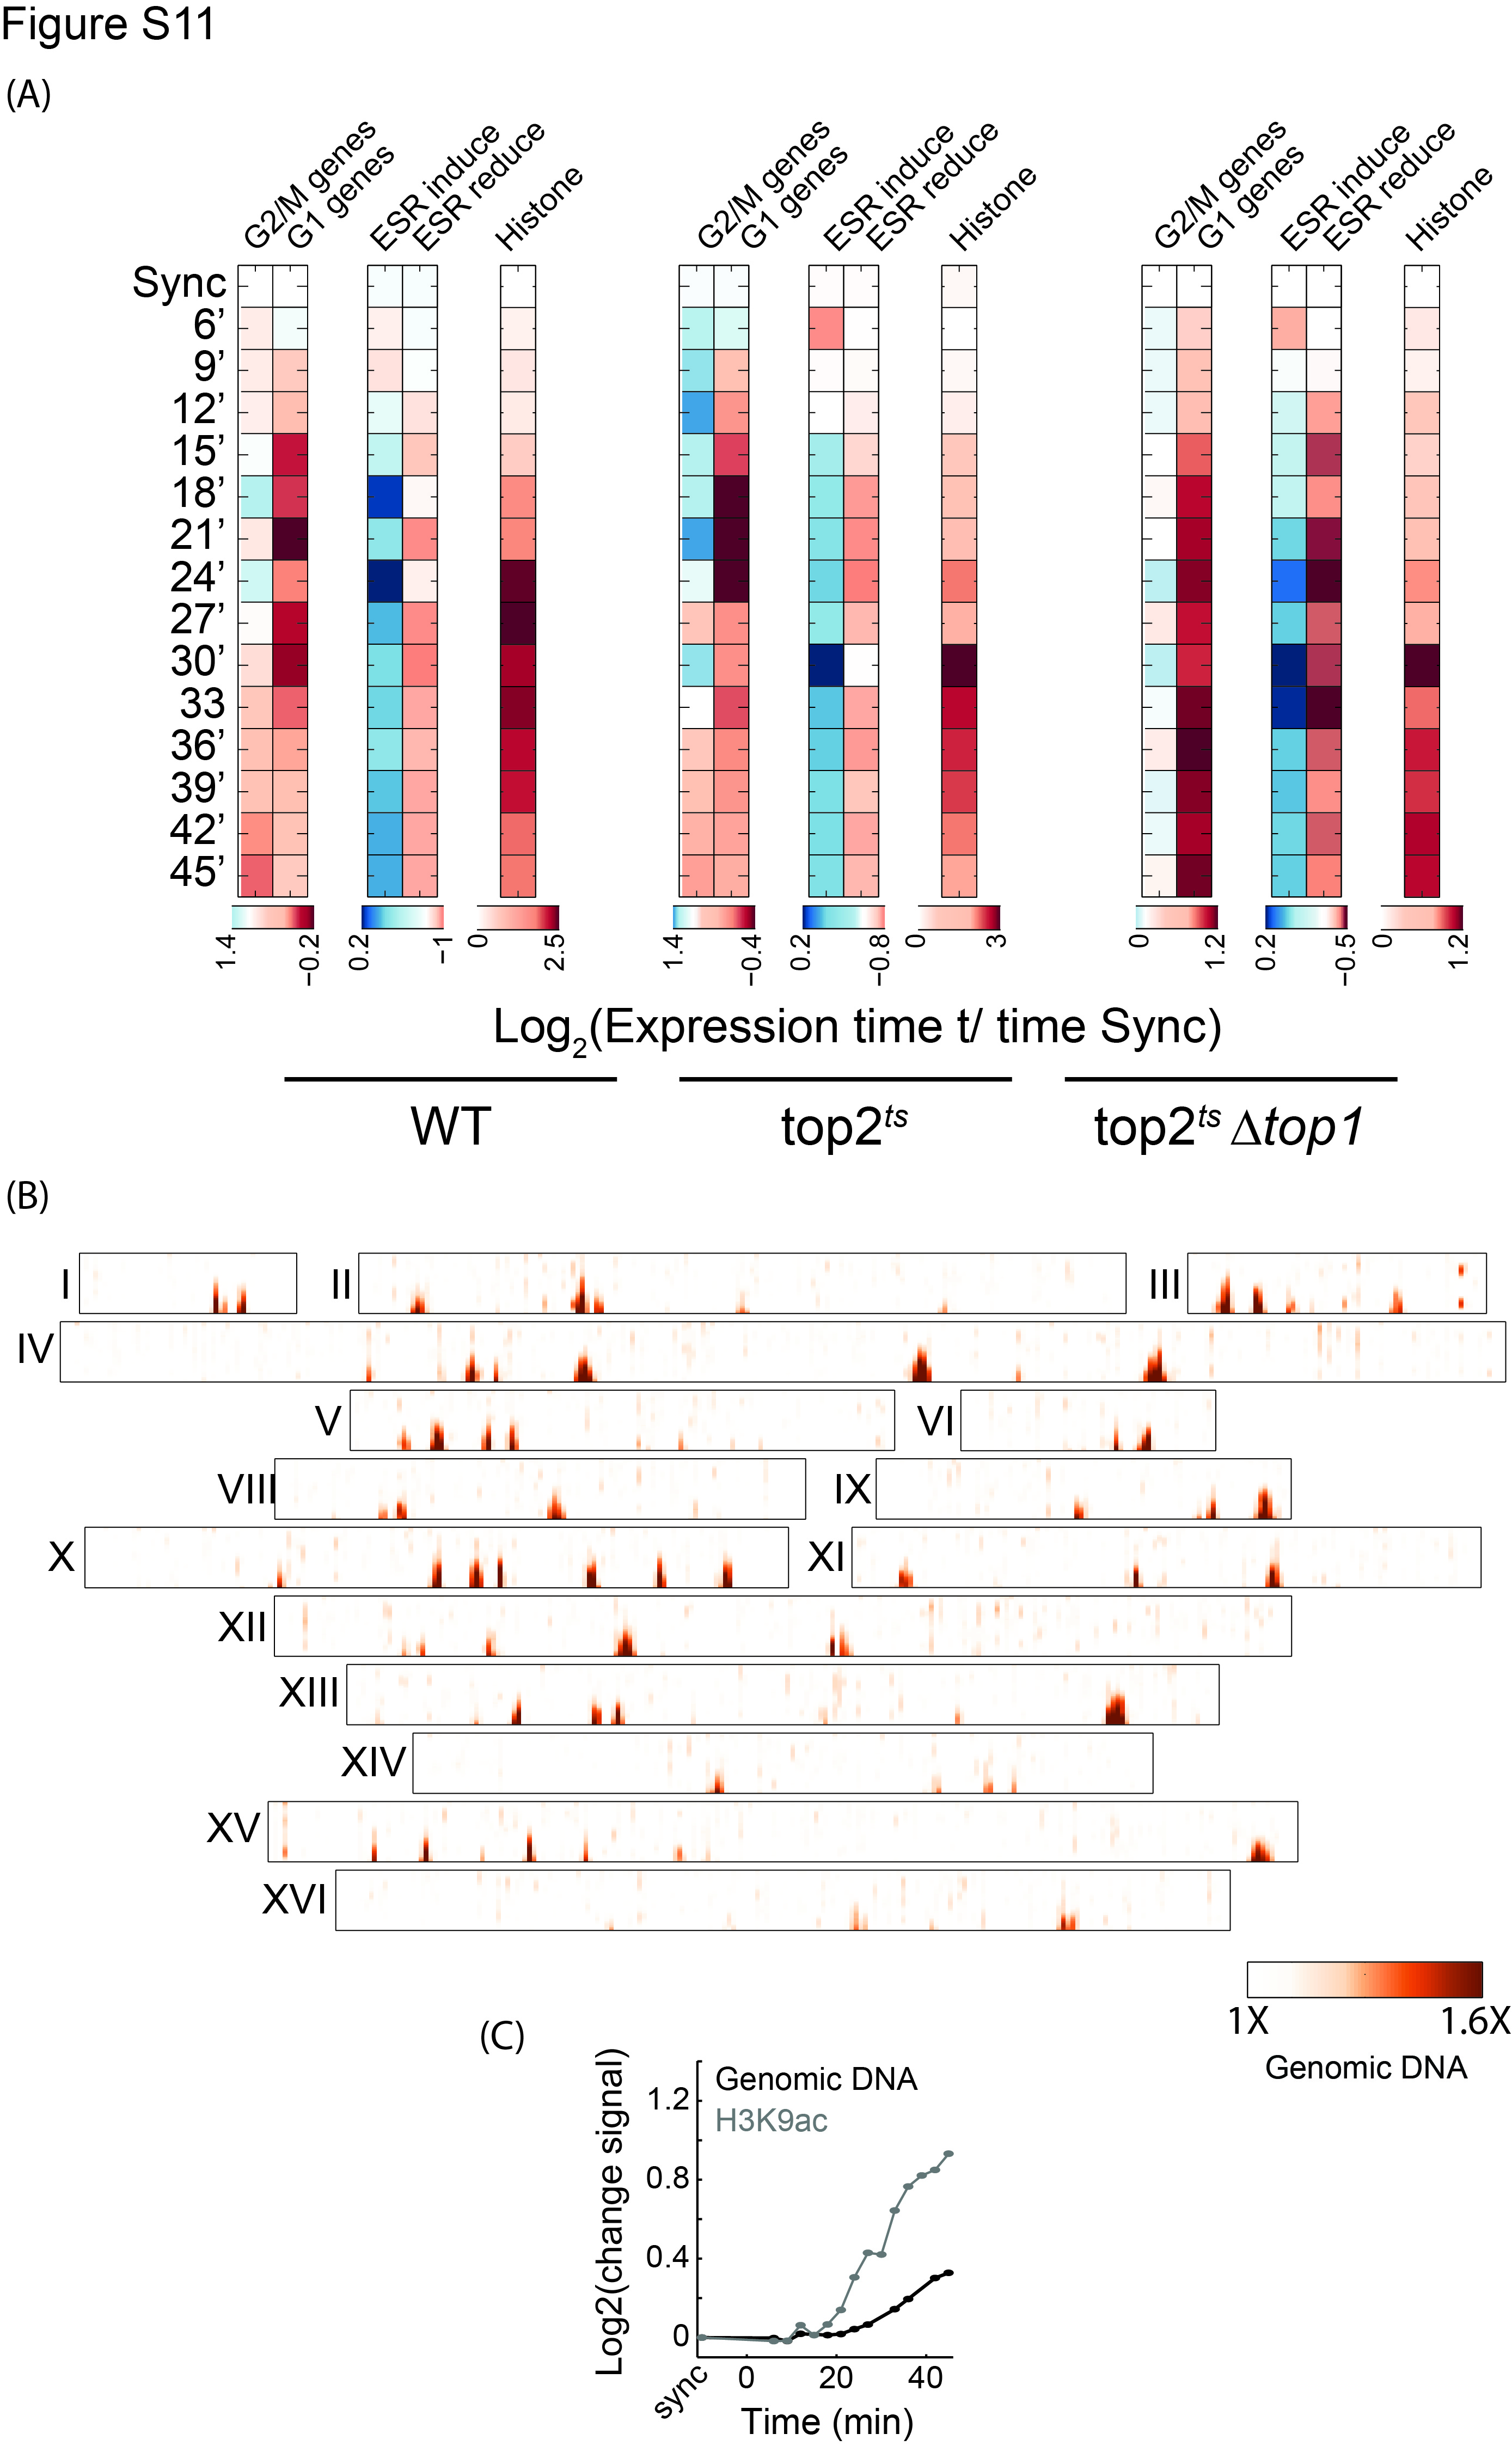


***Figure S11: Topoisomerases depletion strengthens H3K9ac signal***

1. *Gene expression changes:* Expression changes in topoisomerases-depleted strains and W303 strain when synchronizing with α-factor as described. Plotted as in Figure 1B.
2. *Replication halts when depleting both yeast topoisomerases:* DNA content as measured by DNA sequencing, in a strain depleted of both topoisomerases, for all chromosomes except VII (presented in Figure 6C).
3. *H3K9ac precedes replication:* As in Figure 6G, for the second cluster of replication in *top2tstop1.*
