# Supplementary material for: Chromatin dynamics during DNA replication
Source: HighWire-hosted journal article supplement (doi:10.1101/gr.201244.115), 2016-05-25
Supplement: Supplemental_Fig_S12.docx [file Supplemental_Fig_S12.docx]

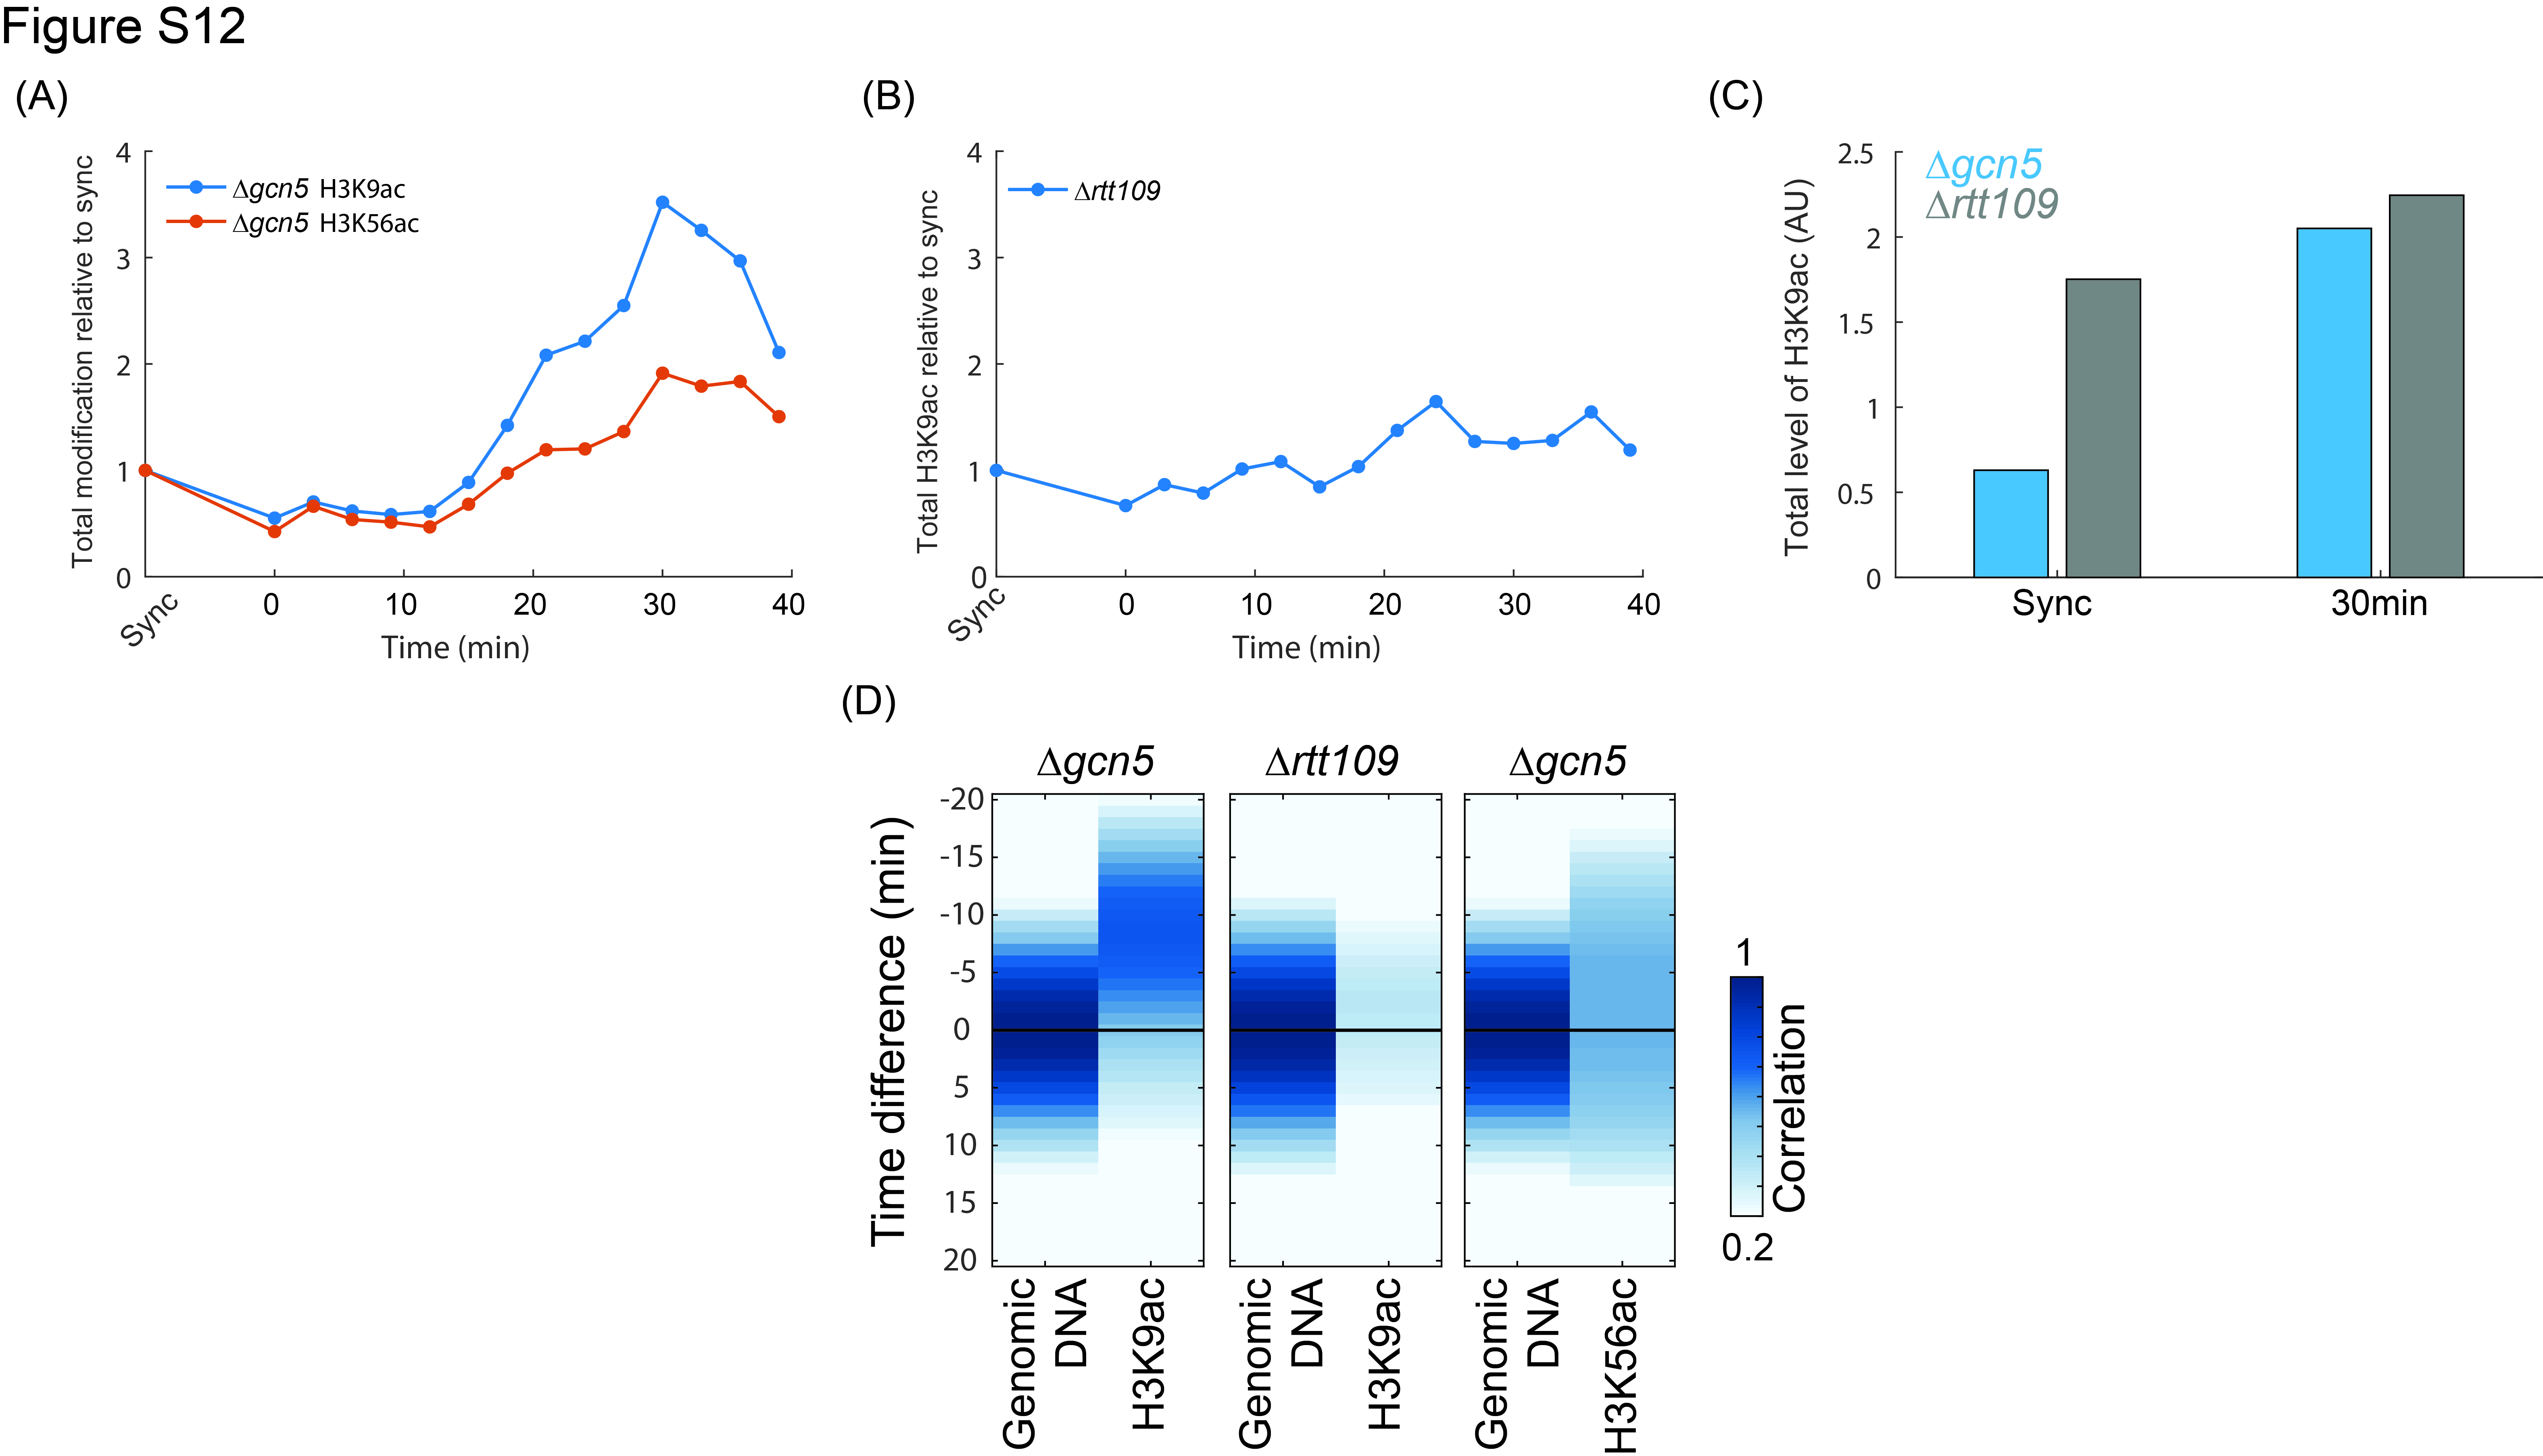


***Figure S12: H3K9ac total levels during S-phase in rtt109 and gcn5, as measured by S. pombe spiking***

To examine the sensitivity of our analysis to changes in total modification levels, we analyzed the modification levels in rtt109 & gcn5 -factor time courses, in which *S. pombe* spiking was used (Note S2).

(A)-(B) Total amount of H3K9ac & H3K56ac relative to the synchronized time point, as calculated using *S.pombe* spiking (See Note S2). Calculated amounts are plotted for *gcn5* (A) or *rtt109* (B) released from G1 synchronization. While both total H3K9ac and H3K56ac increase upon entry into S-phase in gcn5, this increase is not seen in rtt109.

Total modification level (up to a constant factor) was calculated as follows:

Defining:

1. – Amount of *S. cerevisiae* & *S. pombe* in the sample before the IP, respectively
2. – Amount of DNA from *S. cerevisiae* & *S. pombe* in the sample after the IP.
3. - Amount of input sequences of *S. cerevisiae* & *S. pombe*.
4. - Amount of sequences of *S. cerevisiae* & *S. pombe* from ChIP-seq.
5. – Level of modification in *S. cerevisiae* & *S. pombe* (“Enrichment”).

We want to get in terms of our observations: . This will give us an estimation of the total modification in *S. Cerevisiae* as stays constant.

and Assuming sequencing conserves the amounts ratios, we get:

(C) Rtt109 contributes to total level of H3K9ac mostly in S-phase. Levels of total H3K9ac are plotted for *gcn5* & *rtt109* in the synchronized time-point and in the middle of S-phase for comparison. Note that Gcn5 contributes the majority of H3K9ac when cells are not in S-phase, while during S-phase the contributions of Gcn5 and Rtt109 are similar.

(D) Calculating the delay of H3K9ac & H3K56ac relative to the DNA content as in Figure 5A & S9D, was repeated after taking into account the total levels of modifications calculated using the *S. pombe* spiking. Note that the predicted time-delay between H3K9ac appearance and DNA replication is insensitive to this normalization.
