# Supplementary material for: Chromatin dynamics during DNA replication
Source: HighWire-hosted journal article supplement (doi:10.1101/gr.201244.115), 2016-05-25
Supplement: Supplemental_Material.docx [file Supplemental_Material.docx]

**Note S1: Decrease in relative signal for histone modifications or Genomic DNA**

An inherent problem of genome-wide experiments like ChIP-seq or genomic-DNA sequencing is relativity (see also note S2). In other words, changes in total level of signal between samples or time-points can’t be detected. Each separate experiment can quantify relative differences between loci in the genome, but total levels are assumed to stay the same. Thus, a real increase in one location might create a seemingly decrease of non-changing positions. Sequencing genomic DNA gives an easy to interpret example, as regions can only increase their levels, but averaging along late replicating regions (e.g. Figure 4B) show an initial decrease. In this case, using the non-decreasing assumption we can infer the absolute level of genomic DNA (Methods). In Chip-seq targeting a histone modification – this normalization method can’t be used, as a modification can be erased or added, so signal may increase or decrease actively.

**Note S2: Normalization of ChIP-seq data using spiking with *S. pombe***

Typically, it is difficult to compare samples for the total enrichment level between different biological samples. To deal with this problem, we used *S. pombe* chromatin as a normalization instrument. *S. pombe* and *S. cerevisiae* have diverged ~1,200 million years ago. In a recent study Sun et al. 2012, *S. pombe* was used for normalization of mRNA microarray data, by adding a similar amount of fission yeast to budding yeast samples, based on OD measurements. In experiments where cells were synchronized using hydroxyurea, we added in the beginning of the ChIP procedure, a portion of fixated *S. pombe* cells (strain SR35, kindly provided by Prof. Karagiannis and described in (Rentas et al. 2012)), which were mixed with *S. cerevisiae*, right after fixation. Cells were mixed so that every antibody sample would consist of 2-5% *S. pombe*, and the rest of *S. cerevisiae*. From each sample, it is possible to probe the modification signal, and also learn the percentage of *S. pombe* sequences. It is possible to use the ratio between the DNA of the species in the input sample (not subjected to antibodies) in each experiment to normalize the signal. Unfortunately, this method did not work well. As a side note, H3K79 methylation does not exist in *S. pombe*, and indeed no *S. pombe* sequences were received for these samples. For the experiments of the acetyltransferases deletions (Figure 5), with -factor synchronization, we again attempted to incorporate this normalization method. However in these experiments *S. pombe* and *S. cerevisiae* were mixed only after sonication. In other words, *S. pombe* and *S. cerevisiae* were fixated, lysed, and sonicated separately, and only before aliquoting the chromatin samples to the different antibodies and aliquoting a sample for “input”, were the two yeasts mixed. Adding the *S. pombe* at this stage has yielded much better results and we suggest it can be used to normalize ChIP-seq data. The results of this analysis are summarized in Figure S12.

**Table S1: Antibodies used in this study**

| Antibody | Target | Company | Catalog number |
| --- | --- | --- | --- |
| Acetylations | H3 | Abcam | ab1791 |
| H3K9ac | Abcam | ab4441 |
| H4K16ac | Abcam | ab61240 |
| H3K56ac* | Millipore | 07-677 |
| Methylations | H3K4me1 | Abcam | ab8895 |
| H3K4me2 | Abcam | ab7766 |
| H3K4me3 | Abcam | ab1012 |
| H3K79me2 | Abcam | ab3594 |
| H3K79me3 | Abcam | ab2621 |
| H3K36me2 | Abcam | ab9049 |
| H3K36me3 | Abcam | ab9050 |
| RNA Polymerase | Pol II (CTD) 8WG16 | Covance | MMS-126R |

* Used only in the -factor experiments

**Table S2: Yeast strains used in this study**

| Strain | Genotype | Source |
| --- | --- | --- |
| Tagged wild type (BY4741) | *MATa, his3Δ1, leu2Δ0, met15Δ0, ura3Δ0, Rpd3-9Myc-HIS3, Whi5-HA-HYG* | This study |
| *rtt109Δ* | *MATa, his3Δ1, leu2Δ0, met15Δ0, ura3Δ0, rtt109Δ0::KanMX4* | This study |
| *gcn5Δ* | *MATa, his3Δ1, leu2Δ0, met15Δ0, ura3Δ0 gcn5Δ0::KanMX4* | This study |
| H3K9A | *MATa his3Δ200 leu2Δ0 lys2Δ0 trp1Δ63 ura3Δ0 met15Δ0 can1::MFA1pr-HIS3 hht1-hhf1::NatMX4 hht2-hhf2::[HHTS-K9A-HHFS]*-URA3* | Open Biosystems, Dharmacon, Cat. #YSC5106 |
| H3K56A | *MATa his3Δ200 leu2Δ0 lys2Δ0 trp1Δ63 ura3Δ0 met15Δ0 can1::MFA1pr-HIS3 hht1-hhf1::NatMX4 hht2-hhf2::[HHTS-K56A-HHFS]*-URA3* | Open Biosystems, Dharmacon, Cat. #YSC5106 |
| Wild type (W303) | *MATa ade2-1 trp1-1 his3-11,-15 ura3-1 leu2-3,-112 can1-100* | Ay-120  from  Pedersen et al, 2012 |
| *Top2ts* | *Ay-120 with top2-1ts* | Ay-127  from  Pedersen et al, 2012 |
| *Top1ΔTop2ts* | *Ay-120 with top2-1ts top1::NAT* | Ay-109  from  Pedersen et al, 2012 |
| *SR35 (S. pombe)* | *set3-HA::ura4+ snt1-myc::ura4+ ura4-D18* | SR35 from  Rentas et al. 2012  (Rentas et al. 2012) |

Rentas S, Saberianfar R, Grewal C, Kanippayoor R, Mishra M, McCollum D, Karagiannis J. 2012. The SET domain protein, set3p, promotes the reliable execution of cytokinesis in schizosaccharomyces pombe. *PLoS One* **7**.

Sun M, Schwalb B, Schulz D, Pirkl N, Etzold S, Larivière L, Maier KC, Seizl M, Tresch A, Cramer P. 2012. Comparative dynamic transcriptome analysis (cDTA) reveals mutual feedback between mRNA synthesis and degradation. *Genome Res* **22**: 1350–9.
